# Supplementary material for: TBX5 genetic variants and SCD-CAD susceptibility: insights from Chinese Han cohorts
Source: PeerJ journal article supplement (doi:10.7717/peerj.17139), 2024-03-19
Supplement: Cell_Line_Authentication_Service.pdf [file Cell_Line_Authentication_Service.pdf]

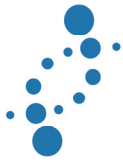

## Cell Line Authentication Service STR Profile Report

**Sample Submitted By:** Dr. Yuzhen Gao  
Soochow University  
**Email Address:** yuzhengao@suda.edu.cn  
**Sales Order:** 231108F  
**Cell Line Designation:** HEK293T  
**Date Sample Received:** Nov 8<sup>th</sup>, 2023  
**Report Date:** Nov 8<sup>th</sup>, 2023

**Methodology:** Twenty-one short tandem repeat (STR) loci plus the Amelogenin locus were amplified using the commercially available SiFaSTR™ 23 plex Kit. The cell line sample was processed using the ABI Prism® 3130 XL Genetic Analyzer. Data were analyzed using GeneMapper® ID v3.2 software (Applied Biosystems). Appropriate positive and negative controls were run and confirmed for each sample submitted.

**Data Interpretation:** Cell lines were authenticated using Short Tandem Repeat (STR) analysis as described in 2021 in ANSI Standard (ASN-0002) by the ATCC Standards Development Organization (SDO) and in Jamie L. Almeida et al., Authentication of Human and Mouse Cell Lines by Short Tandem Repeat (STR) DNA Genotype Analysis. Assay Guidance Manual. PMID: 23805434. Bookshelf ID: NBK144066.

**GTB™ performs STR Profiling following ISO 9001:2008 and ISO/IEC 17025:2005 quality standards.**

There are no warranties with respect to the services or results supplied, express or implied, including, without limitation, any implied warranty of merchantability or fitness for a particular purpose. Genetic Testing Biotechnology (GTB) is not liable for any damages or injuries resulting from receipt and/or improper, inappropriate, negligent or other wrongful use of the test results supplied, and/or from misidentification, misrepresentation, or lack of accuracy of those results. Your exclusive remedy against GTB and those supplying materials used in the services for any losses or damage of any kind whatsoever, whether in contract, tort, or otherwise, shall be, at GTB's option, refund of the fee paid for such service or repeat of the service.

**NOTE: According to the recommendations of *IJC* on cell line authentication, the report is valid for 3 years since the issue date.**

---

Technical Questions?  
GTB Technical Support  
+86-512-67486171  
service@jsdna.org  
Section 505, Yixin BLD  
SIP, Suzhou, 215123  
Jiangsu, P.R. China

---

Ordering Questions?  
order@jsdna.org  
GTB Corporation  
+86-512-62806339  
Section 303, Yixin BLD  
SIP, Suzhou, 215123  
Jiangsu, P.R. China



## Cell Line Authentication Service STR Profile Report

Sales Order: 231108F

| Loci       | Test Results for Submitted Sample |      | ExPASy Reference Database Profile |      |
|------------|-----------------------------------|------|-----------------------------------|------|
|            | Query Profile: HEK293T            |      | Database Profile: HEK293T         |      |
| Amelogenin | X                                 |      |                                   |      |
| D3S1358    | 15                                | 17   | 15                                | 17   |
| D5S818     | 8                                 | 9    | 8                                 | 9    |
| D2S1338    | 19                                |      |                                   |      |
| TPOX       | 11                                |      | 11                                |      |
| CSF1PO     | 11                                | 12   | 11                                | 12   |
| Penta D    | 9                                 | 10   |                                   |      |
| TH01       | 7                                 | 9.3  | 7                                 | 9.3  |
| vWA        | 16                                | 19   | 16                                | 19   |
| D7S820     | 11                                |      | 11                                |      |
| D21S11     | 28                                | 30.2 | 28                                | 30.2 |
| Penta E    | 7                                 | 15   |                                   |      |
| D10S1248   | 14                                |      |                                   |      |
| D8S1179    | 12                                | 14   | 12                                | 14   |
| D1S1656    | 15                                | 17.3 |                                   |      |
| D18S51     | 17                                | 18   | 17                                | 18   |
| D12S391    | 19                                | 21   |                                   |      |
| D6S1043    | 11                                |      |                                   |      |
| D19S433    | 18                                |      |                                   |      |
| D16S539    | 9                                 | 13   | 9                                 | 13   |
| D13S317    | 12                                | 14   | 12                                | 14   |
| FGA        | 23                                |      | 23                                |      |

*The allele match algorithm compares the 13 core STR loci only, even though alleles from all loci will be reported when available.*

*Note: Loci highlighted in grey (13 core STR loci) can be made public to verify cell identity. In order to protect the identity of the donor, **please do not publish** the allele calls from all the STR loci tested.*

*The sample match is based on the reference data available at the time of comparison.*

### Explanation of Test Results

Cell lines with  $\geq 80\%$  match are derived from the same donor. Cell lines with between a 70% to 79% match require further profiling for authentication of relatedness. Cell lines with  $< 70\%$  match are very unlikely to be from the same donor.

- The submitted sample profile is human, but not a match for any profile in the ExPASy STR database.
- The submitted profile is an exact match for the following human cell line(s) in the ExPASy STR database (13 core STR loci): HEK293T
- The submitted profile is similar to the following ExPASy human cell line(s):

e-Signature Technician:

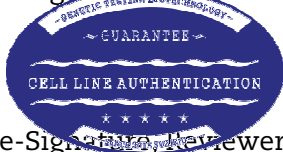

e-Signature Reviewer:

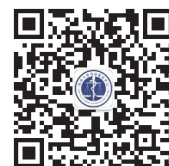

[More information](#)

**Addendum:** Electropherogram for the customer's sample set 1 of 1

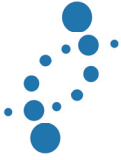

# Cell Line Authentication Service STR Profile Report

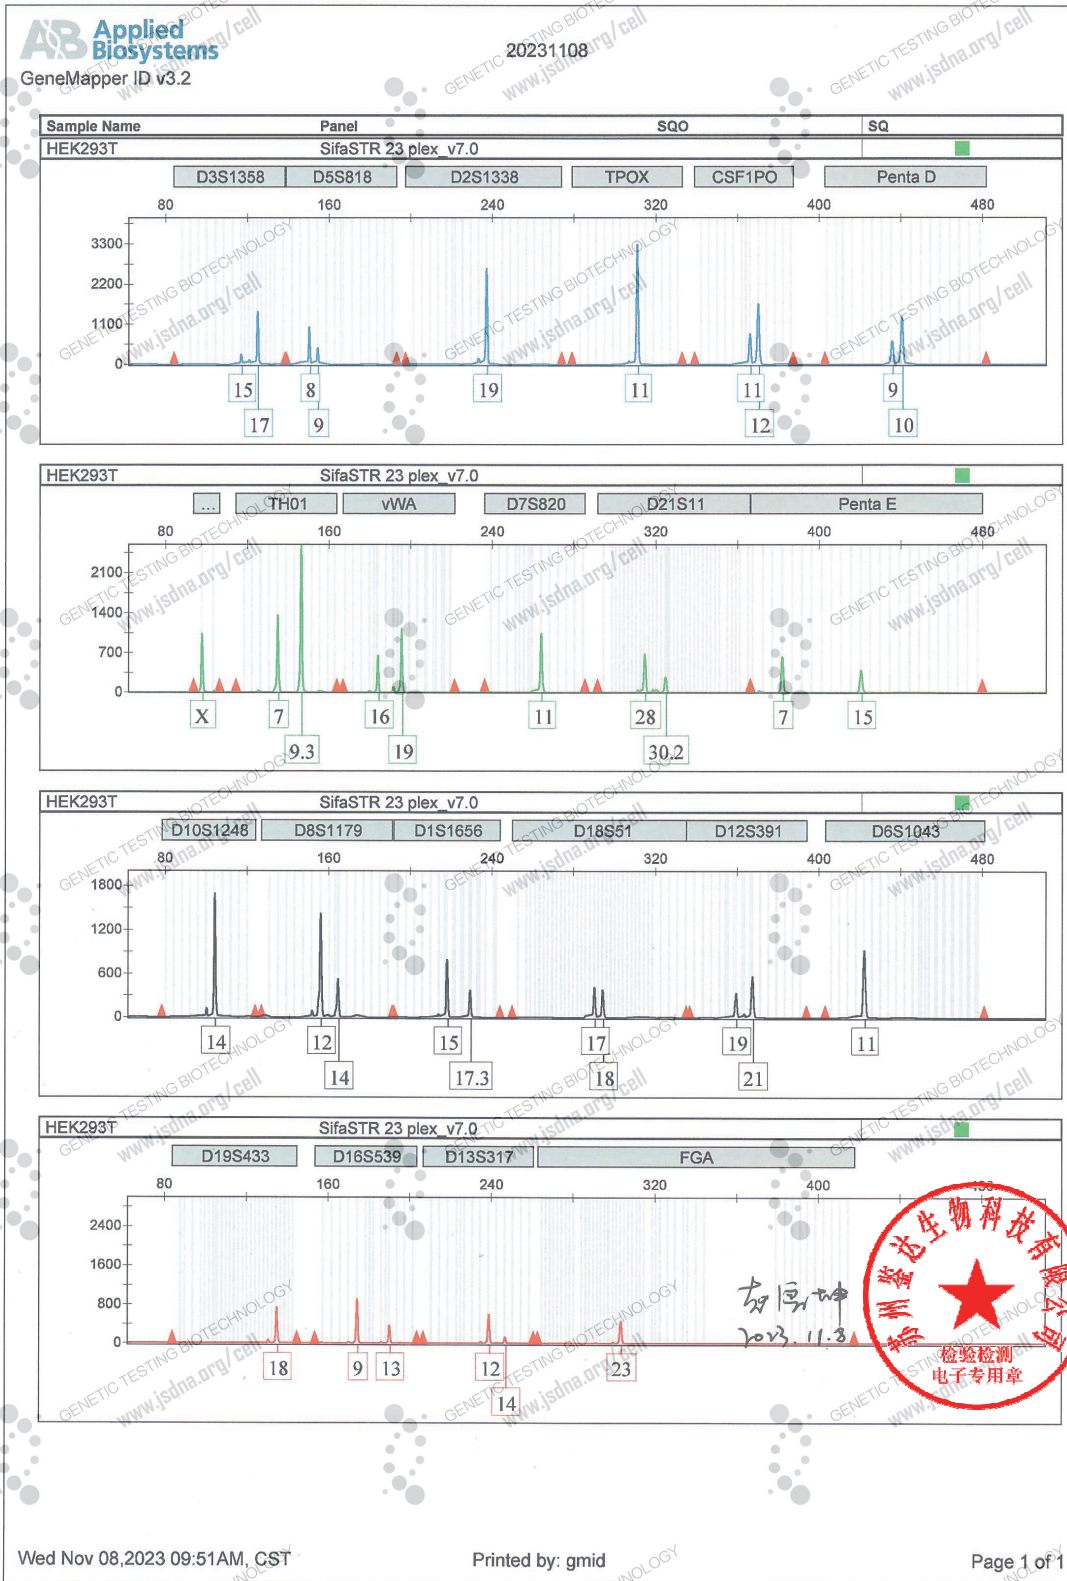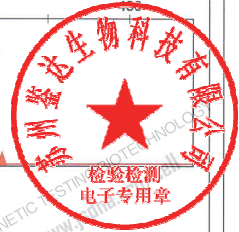

李国坤  
2023.11.3
